# Supplementary material
Source: Springer Nature journal article supplement (https://www.springermedizin.de/resource/supplementary/12931_2013_1592_MOESM4_ESM.pdf/10243336)

BAL fluid

Myeloid DCs

Plasmacytoid DCs

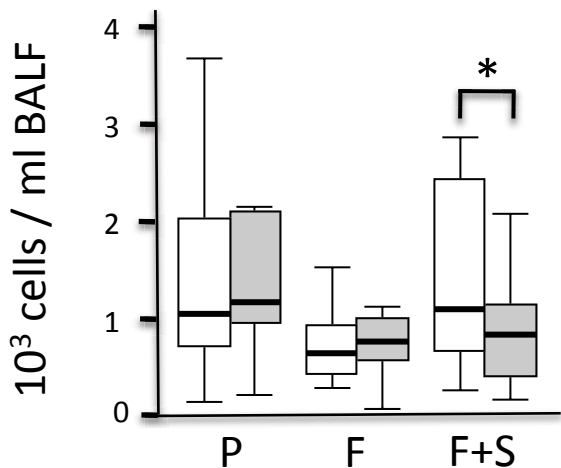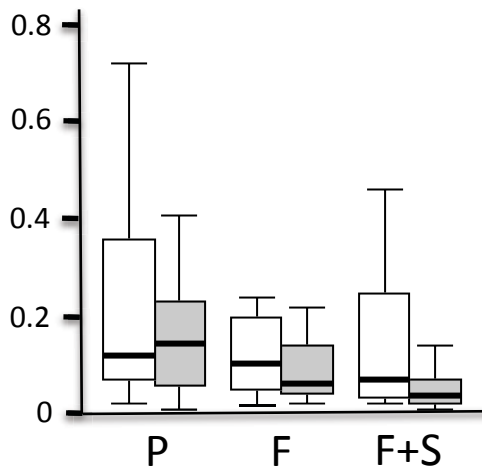

Blood

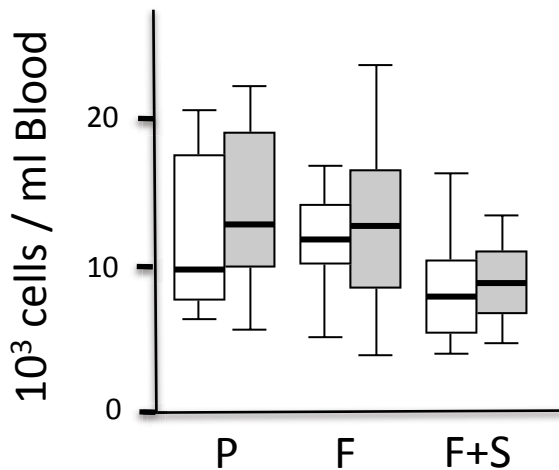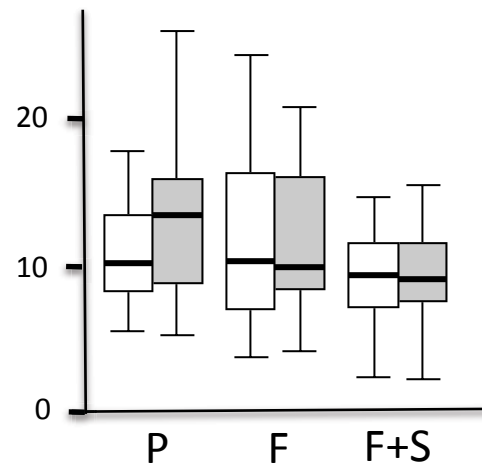

□ before treatment

■ after treatment

Supplement: MOESM4 [file 10243336]
